# Supplementary material for: A global model for predicting the arrival of imported dengue infections
Source: PubMed Central journal article supplement (PMC6892502; doi:10.1371/journal.pone.0225193), 2019-12-04
Supplement: pone.0225193.s001.pdf [file pone.0225193.s001.pdf]

# Supplementary material

Jessica Liebig, Cassie Jansen, Dean Paini, Lauren Gardner, Raja Jurdak

## IATA DATA

**Table A. List of airport abbreviations**

| IATA<br>3-Letter<br>Code | Name                                                        | City (Country/State)        | IATA<br>3-Letter<br>Code | Name                                                | City (Country/State)                            |
|--------------------------|-------------------------------------------------------------|-----------------------------|--------------------------|-----------------------------------------------------|-------------------------------------------------|
| AEP                      | Jorge Newbery Airport                                       | Buenos Aires (Argentina)    | LAX                      | Los Angeles International Airport                   | Los Angeles (California)                        |
| BKK                      | Suvarnabhumi Airport                                        | Bangkok (Thailand)          | LHR                      | Heathrow Airport                                    | London (UK)                                     |
| BNE                      | Brisbane Airport                                            | Brisbane (Queensland)       | MAD                      | Adolfo Suárez Madrid-Barajas Airport                | Madrid (Spain)                                  |
| BOM                      | Chhatrapati Shivaji International Airport                   | Mumbai (India)              | MCO                      | Orlando International Airport                       | Orlando (Florida)                               |
| CDG                      | Charles de Gaulle Airport                                   | Paris (France)              | MEX                      | Mexico City International Airport                   | Mexico City (Mexico)                            |
| COK                      | Cochin International Airport                                | Kochi (India)               | MIA                      | Miami International Airport                         | Miami (Florida)                                 |
| CUN                      | Cancún International Airport                                | Cancún (Mexico)             | MNL                      | Ninoy Aquino International Airport                  | Manila (Philippines)                            |
| DEL                      | Indira Gandhi International Airport                         | New Delhi (India)           | MTY                      | Monterrey International Airport                     | Apodaca (Mexico)                                |
| DFW                      | Dallas/Fort Worth International Airport                     | Dallas (Texas)              | MXP                      | Milan Malpensa Airport                              | Milan (Italy)                                   |
| DPS                      | Ngurah Rai International Airport                            | Denpasar (Indonesia)        | NRT                      | Narita International Airport                        | Tokyo (Japan)                                   |
| DXB                      | Dubai International Airport                                 | Dubai (UAE)                 | ORY                      | Paris Orly Airport                                  | Paris (France)                                  |
| EZE                      | Ministro Pistarini International Airport                    | Buenos Aires (Argentina)    | PER                      | Perth Airport                                       | Perth (Western Australia)                       |
| FDF                      | Martinique Aimé Césaire International Airport               | Fort-de-France (Martinique) | PTP                      | Pointe-à-Pitre International Airport                | Pointe-à-Pitre (Guadeloupe)                     |
| FLL                      | Fort Lauderdale-Hollywood International Airport             | Miami (Florida)             | PUJ                      | Punta Cana International Airport                    | Punta Cana (Dominican Republic)                 |
| GDL                      | Miguel Hidalgo y Costilla Guadalajara International Airport | Guadalajara (Mexico)        | SAL                      | Monseñor Óscar Arnulfo Romero International Airport | San Salvador (El Salvador)                      |
| GRU                      | São Paulo International Airport                             | São Paulo (Brazil)          | SDQ                      | Las Américas International Airport                  | Punta Caucedo (Dominican Republic)              |
| ICN                      | Incheon International Airport                               | Seoul (South Korea)         | SFO                      | San Francisco International Airport                 | San Francisco (California)                      |
| IAH                      | George Bush Intercontinental Airport                        | Houston (Texas)             | SJU                      | Luis Muñoz Marín International Airport              | San Juan (Puerto Rico)                          |
| JFK                      | John F. Kennedy International Airport                       | New York City (New York)    | STI                      | Cibao International Airport                         | Santiago de los Caballeros (Dominican Republic) |
| KBL                      | Hamid Karzai International Airport                          | Kabul (Afghanistan)         | TPE                      | Taiwan Taoyuan International Airport                | Taipei (Taiwan)                                 |

**Table B. List of non-endemic countries where IATA data is inaccurate**

|                          |          |                                 |                                |
|--------------------------|----------|---------------------------------|--------------------------------|
| Algeria                  | Bahrain  | Bonaire, Saint Eustatius & Saba | Bulgaria                       |
| Central African Republic | Croatia  | Egypt                           | Federated States of Micronesia |
| Finland                  | Germany  | Guinea-Bissau                   | Greece                         |
| Hungary                  | Iceland  | Iran                            | Israel                         |
| Malawi                   | Morocco  | Netherlands                     | Russian Federation             |
| Serbia                   | Slovenia | South Africa                    | South Korea                    |
| Tanzania                 | Togo     | The Gambia                      | Tunisia                        |
| Turkey                   | Uganda   | Ukraine                         | Zambia                         |

**Table C. List of countries indicating whether dengue vectors are present and whether the country is endemic. Information about endemicity was obtained from [1]. Information about vector presence was obtained from [2].**

| Country                         | Endemic | Vector presence | Country        | Endemic | Vector presence | Country                          | Endemic | Vector presence |
|---------------------------------|---------|-----------------|----------------|---------|-----------------|----------------------------------|---------|-----------------|
| Afghanistan                     | no      | yes             | Ghana          | no      | yes             | Pakistan                         | yes     | yes             |
| Albania                         | no      | yes             | Gibraltar      | no      | yes             | Palau                            | yes     | yes             |
| Algeria                         | no      | yes             | Greece         | no      | yes             | Palestine                        | no      | yes             |
| American Samoa                  | no      | yes             | Greenland      | no      | no              | Panama                           | yes     | yes             |
| Andorra                         | no      | no              | Grenada        | yes     | yes             | Papua New Guinea                 | yes     | yes             |
| Angola                          | yes     | yes             | Guadeloupe     | yes     | yes             | Paraguay                         | yes     | yes             |
| Anguilla                        | yes     | yes             | Guam           | no      | no              | Peru                             | yes     | yes             |
| Antarctica                      | no      | no              | Guatemala      | yes     | yes             | Philippines                      | yes     | yes             |
| Antigua and Barbuda             | yes     | yes             | Guinea         | yes     | yes             | Poland                           | no      | no              |
| Argentina                       | yes     | yes             | Guinea-Bissau  | no      | yes             | Portugal                         | no      | yes             |
| Armenia                         | no      | yes             | Guyana         | yes     | yes             | Puerto Rico                      | yes     | yes             |
| Aruba                           | yes     | yes             | Haiti          | yes     | yes             | Qatar                            | no      | no              |
| Australia                       | no      | yes             | Honduras       | yes     | yes             | Reunion                          | yes     | yes             |
| Austria                         | no      | yes             | Hong Kong      | yes     | yes             | Romania                          | no      | yes             |
| Azerbaijan                      | no      | no              | Hungary        | no      | yes             | Russian Federation               | no      | yes             |
| Bahrain                         | no      | no              | Iceland        | no      | no              | Rwanda                           | no      | yes             |
| Bangladesh                      | yes     | yes             | India          | yes     | yes             | Saint Helena                     | no      | no              |
| Barbados                        | yes     | yes             | Indonesia      | yes     | yes             | Saint Kitts and Nevis            | yes     | yes             |
| Belarus                         | no      | no              | Inner Hebrides | no      | no              | Saint Lucia                      | yes     | yes             |
| Belgium                         | no      | yes             | Iran           | no      | no              | Saint Pierre and Miquelon        | no      | no              |
| Belize                          | yes     | yes             | Iraq           | no      | no              | Saint Vincent and the Grenadines | yes     | yes             |
| Benin                           | no      | yes             | Ireland        | no      | no              | Samoa                            | no      | yes             |
| Bermuda                         | no      | yes             | Israel         | no      | yes             | Sao Tome and Principe            | no      | no              |
| Bhutan                          | yes     | yes             | Italy          | no      | yes             | Saudi Arabia                     | yes     | yes             |
| Bolivia                         | yes     | yes             | Jamaica        | yes     | yes             | Senegal                          | yes     | yes             |
| Bonaire, Saint Eustatius & Saba | no      | yes             | Japan          | no      | no              | Serbia                           | no      | yes             |
| Bosnia and Herzegovina          | no      | yes             | Jordan         | no      | yes             | Seychelles                       | yes     | yes             |
| Botswana                        | no      | no              | Kazakhstan     | no      | no              | Sierra Leone                     | yes     | yes             |
| Brazil                          | yes     | yes             | Kenya          | yes     | yes             | Singapore                        | yes     | yes             |
| Brunei                          | yes     | yes             | Kiribati       | no      | yes             | Sint Maarten                     | no      | yes             |
| Bulgaria                        | no      | yes             | Kuwait         | no      | no              | Slovakia                         | no      | yes             |
| Burkina Faso                    | yes     | yes             | Kyrgyzstan     | no      | no              | Slovenia                         | no      | yes             |
| Burundi                         | no      | yes             | Laos           | yes     | yes             | Solomon Islands                  | yes     | yes             |
| Cambodia                        | yes     | yes             | Latvia         | no      | no              | Somalia                          | yes     | yes             |
| Cameroon                        | yes     | yes             | Lebanon        | no      | yes             | South Africa                     | no      | no              |
| Canada                          | no      | no              | Lesotho        | no      | no              | South Korea                      | no      | no              |
| Cape Verde                      | yes     | yes             | Liberia        | no      | yes             | South Sudan                      | yes     | yes             |
| Cayman Islands                  | yes     | yes             | Libya          | no      | no              | Spain                            | no      | yes             |

| Country                          | Endemic | Vector presence | Country                  | Endemic | Vector presence | Country                              | Endemic | Vector presence |
|----------------------------------|---------|-----------------|--------------------------|---------|-----------------|--------------------------------------|---------|-----------------|
| Central African Republic         | no      | yes             | Liechtenstein            | no      | no              | Sri Lanka                            | yes     | yes             |
| Chad                             | no      | yes             | Lithuania                | no      | no              | Sudan                                | yes     | yes             |
| Channel Islands                  | no      | no              | Luxembourg               | no      | no              | Suriname                             | yes     | yes             |
| Chile                            | no      | no              | Macau                    | yes     | yes             | Swaziland                            | no      | no              |
| China                            | yes     | yes             | Macedonia                | no      | yes             | Sweden                               | no      | no              |
| Christmas Island                 | no      | no              | Madagascar               | yes     | yes             | Switzerland                          | no      | yes             |
| Cocos (Keeling) Islands          | no      | no              | Malawi                   | no      | yes             | Syria                                | no      | yes             |
| Colombia                         | yes     | yes             | Malaysia                 | yes     | yes             | Taiwan                               | yes     | yes             |
| Comoros                          | yes     | yes             | Maldives                 | no      | yes             | Tajikistan                           | no      | no              |
| Congo                            | no      | yes             | Mali                     | yes     | yes             | Tanzania                             | no      | yes             |
| Cook Islands                     | no      | yes             | Malta                    | no      | yes             | Thailand                             | yes     | yes             |
| Costa Rica                       | yes     | yes             | Marshall Islands         | no      | yes             | The Bahamas                          | yes     | yes             |
| Cote d'Ivoire                    | yes     | yes             | Martinique               | yes     | yes             | The Gambia                           | no      | yes             |
| Croatia                          | no      | yes             | Mauritania               | no      | yes             | Timor-Leste                          | yes     | yes             |
| Cuba                             | yes     | yes             | Mauritius                | yes     | yes             | Togo                                 | no      | yes             |
| Curacao                          | no      | yes             | Mayotte                  | yes     | yes             | Tonga                                | no      | yes             |
| Cyprus                           | no      | no              | Mexico                   | yes     | yes             | Trinidad and Tobago                  | yes     | yes             |
| Czech Republic                   | no      | yes             | Moldova                  | no      | no              | Tunisia                              | no      | no              |
| Democratic Republic of the Congo | yes     | yes             | Monaco                   | no      | yes             | Turkey                               | no      | yes             |
| Denmark                          | no      | no              | Mongolia                 | no      | no              | Turkmenistan                         | no      | no              |
| Djibouti                         | yes     | yes             | Montenegro               | no      | yes             | Turks and Caicos Islands             | yes     | yes             |
| Dominica                         | yes     | yes             | Montserrat               | yes     | yes             | Tuvalu                               | no      | yes             |
| Dominican Republic               | yes     | yes             | Morocco                  | no      | no              | Uganda                               | no      | yes             |
| Ecuador                          | yes     | yes             | Mozambique               | yes     | yes             | Ukraine                              | no      | no              |
| Egypt                            | no      | yes             | Myanmar                  | yes     | yes             | United Arab Emirates                 | yes     | yes             |
| El Salvador                      | yes     | yes             | Namibia                  | no      | yes             | United Kingdom                       | no      | no              |
| Equatorial Guinea                | yes     | yes             | Nauru                    | no      | yes             | United States                        | no      | yes             |
| Eritrea                          | yes     | yes             | Nepal                    | yes     | yes             | United States Minor Outlying Islands | no      | no              |
| Estonia                          | no      | no              | Netherlands              | no      | yes             | Uruguay                              | no      | no              |
| Ethiopia                         | yes     | yes             | New Caledonia            | yes     | yes             | Uzbekistan                           | no      | no              |
| Falkland Islands                 | no      | no              | New Zealand              | no      | no              | Vanuatu                              | yes     | yes             |
| Federated States of Micronesia   | no      | yes             | Nicaragua                | yes     | yes             | Venezuela                            | yes     | yes             |
| Fiji                             | no      | yes             | Niger                    | no      | yes             | Vietnam                              | yes     | yes             |
| Finland                          | no      | no              | Nigeria                  | yes     | yes             | Virgin Islands                       | yes     | yes             |
| France                           | no      | yes             | Niue                     | no      | yes             | Wallis and Futuna Islands            | no      | yes             |
| French Guiana                    | yes     | yes             | Norfolk Island           | no      | no              | Western Sahara                       | no      | no              |
| French Polynesia                 | no      | yes             | North Korea              | no      | no              | Yemen                                | yes     | yes             |
| Gabon                            | yes     | yes             | Northern Mariana Islands | no      | yes             | Zambia                               | no      | yes             |
| Georgia                          | no      | yes             | Norway                   | no      | no              | Zimbabwe                             | no      | yes             |
| Germany                          | no      | yes             | Oman                     | yes     | yes             |                                      |         |                 |

## AIRPORT RANKING

Table D shows the predicted annual number of imported dengue cases for each airport that received at least 10 infections per year in 2011 or 2015.

**Table D. Annual estimated imported dengue cases per airport**

| Code | Imported cases 2011 | Imported cases 2015 | Name                                   | City                     | Country/State                             |
|------|---------------------|---------------------|----------------------------------------|--------------------------|-------------------------------------------|
| MIA  | 2413                | 2547                | Miami International                    | Miami                    | US/Florida                                |
| LAX  | 1518                | 1871                | Los Angeles Intl                       | Los Angeles              | US/California                             |
| CDG  | 941                 | 1227                | Charles De Gaulle                      | Paris-De Gaulle          | France/Île-de-France                      |
| SFO  | 831                 | 1166                | San Francisco Intl                     | San Francisco            | US/California                             |
| MCO  | 822                 | 1036                | Orlando Intl                           | Orlando                  | US/Florida                                |
| FLL  | 792                 | 970                 | Ft Lauderdale Intl                     | Fort Lauderdale          | US/Florida                                |
| ORY  | 652                 | 788                 | Orly                                   | Paris-Orly               | France/Île-de-France                      |
| IAH  | 599                 | 810                 | George Bush Intercontinental           | Houston-Intercontinental | US/Texas                                  |
| EZE  | 586                 | 648                 | Ministro Pistarini                     | Buenos Aires             | Argentina/Autonomous City of Buenos Aires |
| MAD  | 385                 | 439                 | Adolfo Suarez-Barajas                  | Madrid                   | Spain/Community of Madrid                 |
| DFW  | 381                 | 478                 | Dallas/Ft Worth Intl                   | Dallas/Fort Worth        | US/Texas                                  |
| BNE  | 379                 | 529                 | Brisbane Intl                          | Brisbane                 | Australia/Queensland                      |
| MXP  | 356                 | 408                 | Malpensa                               | Milan-Malpensa           | Italy/Lombardy                            |
| FCO  | 343                 | 424                 | Fiumicino                              | Rome-Da Vinci            | Italy/Lazio                               |
| AEP  | 258                 | 225                 | Jorge Newbery                          | Buenos Aires-Newbery     | Argentina/Autonomous City of Buenos Aires |
| MLE  | 204                 | 214                 | Ibrahim Nasir International            | Male                     | Maldives/Malé                             |
| POS  | 198                 | 150                 | Piarco International                   | Port of Spain            | Trinidad and Tobago/Port of Spain         |
| TPA  | 160                 | 224                 | Tampa International                    | Tampa                    | US/Florida                                |
| SXM  | 159                 | 184                 | Prinses Juliana International          | St. Maarten              | Sint Maarten                              |
| BCN  | 148                 | 207                 | Barcelona                              | Barcelona                | Spain/Catalonia                           |
| CUR  | 147                 | 173                 | Hato International                     | Curacao                  | Curacao                                   |
| SAN  | 142                 | 181                 | San Diego International Airport        | San Diego                | US/California                             |
| HNL  | 123                 | 153                 | Honolulu Intl                          | Honolulu/Oahu            | US/Hawaii                                 |
| BEY  | 122                 | 162                 | Rafic Hariri International             | Beirut                   | Lebanon/Beirut                            |
| KBL  | 109                 | 155                 | Kabul International                    | Kabul                    | Afghanistan/Kabul                         |
| ACC  | 97                  | 126                 | Kotoka International                   | Accra                    | Ghana/Greater Accra                       |
| SJC  | 88                  | 99                  | San Jose Municipal                     | San Jose                 | US/California                             |
| SAT  | 80                  | 127                 | San Antonio Intl                       | San Antonio              | US/Texas                                  |
| VCE  | 75                  | 108                 | Marco Polo                             | Venice                   | Italy/Veneto                              |
| AUS  | 71                  | 123                 | Austin-Bergstrom International Airport | Austin                   | US/Texas                                  |
| SMF  | 70                  | 94                  | Sacramento International               | Sacramento               | US/California                             |
| OAK  | 65                  | 65                  | Metro Oakland Intl                     | Oakland                  | US/California                             |
| LYS  | 56                  | 72                  | Satolas                                | Lyon                     | France/Auvergne-Rhône-Alpes               |
| OOL  | 55                  | 126                 | Coolangatta                            | Gold Coast               | Australia/Queensland                      |
| JAX  | 53                  | 74                  | Jacksonville Intl                      | Jacksonville             | US/Florida                                |
| MRS  | 53                  | 69                  | Marignane                              | Marseille                | France/Provence-Alpes-Côte d'Azur         |
| NCE  | 53                  | 71                  | Cote D'Azur                            | Nice                     | France/Provence-Alpes-Côte d'Azur         |
| BLQ  | 49                  | 59                  | Guglielmo Marconi                      | Bologna                  | Italy/Emilia-Romagna                      |
| COR  | 46                  | 78                  | Pajas Blancas                          | Córdoba                  | Argentina/Córdoba                         |
| TLS  | 42                  | 53                  | Blagnac                                | Toulouse                 | France/Occitanie                          |
| COO  | 39                  | 66                  | Cadjehoun                              | Cotonou                  | Benin/Littoral                            |
| ONT  | 39                  | 43                  | Ontario Intl                           | Ontario                  | US/California                             |
| SAH  | 38                  | 11                  | Sana'a International                   | Sana'a                   | Yemen/Sana'a                              |
| LIN  | 38                  | 56                  | Linate                                 | Milan-Linate             | Italy/Lombardy                            |
| FAT  | 37                  | 42                  | Fresno Yosemite International          | Fresno                   | US/California                             |
| SNA  | 37                  | 58                  | John Wayne Airport                     | Orange County            | US/California                             |
| DLA  | 33                  | 60                  | Douala International                   | Douala                   | Cameroon/Littoral                         |

| Code | Imported cases 2011 | Imported cases 2015 | Name                               | City                   | Country/State                     |
|------|---------------------|---------------------|------------------------------------|------------------------|-----------------------------------|
| KGL  | 29                  | 48                  | Kigali International Airport       | Kigali                 | Rwanda/Kigali                     |
| PNS  | 27                  | 31                  | Pensacola International            | Pensacola              | US/Florida                        |
| BOD  | 24                  | 33                  | Merignac                           | Bordeaux               | France/Nouvelle-Aquitaine         |
| CAY  | 24                  | 38                  | Felix Eboue                        | Cayenne                | France/French Guiana              |
| NAN  | 23                  | 27                  | Nadi International                 | Nadi                   | Fiji/Ba                           |
| PBM  | 22                  | 34                  | Johan A. Pengel Intl               | Paramaribo             | Suriname/Paramaribo               |
| CNS  | 22                  | 37                  | Cairns International               | Cairns                 | Australia/Queensland              |
| ELP  | 22                  | 25                  | El Paso Intl                       | El Paso                | US/Texas                          |
| NTE  | 21                  | 23                  | Chateau Bougon                     | Nantes                 | France/Pays de la Loire           |
| FLR  | 21                  | 26                  | Peretola                           | Florence               | Italy/Tuscany                     |
| BUR  | 18                  | 9                   | Hollywood-Burbank                  | Burbank                | US/California                     |
| HOU  | 18                  | 38                  | William P Hobby                    | Houston-Hobby          | US/Texas                          |
| PPG  | 17                  | 18                  | Pago Pago Intl                     | Pago Pago              | American Samoa/Maoputasi County   |
| TRN  | 17                  | 20                  | Citta Di Torino                    | Turin                  | Italy/Piedmont                    |
| ROB  | 17                  | 17                  | Roberts Intl                       | Monrovia-Roberts       | Liberia                           |
| MFE  | 15                  | 14                  | Miller International               | McAllen                | US/Texas                          |
| PBI  | 15                  | 23                  | Palm Beach Intl                    | West Palm Beach        | US/Florida                        |
| LGB  | 15                  | 13                  | Long Beach Municipal               | Long Beach             | US/California                     |
| BZV  | 15                  | 29                  | Maya Maya                          | Brazzaville            | Congo/Brazzaville                 |
| NAP  | 14                  | 16                  | Capodichino                        | Naples                 | Italy/Campania                    |
| TLH  | 14                  | 21                  | Tallahassee International          | Tallahassee            | US/Florida                        |
| MDZ  | 13                  | 20                  | El Plumerillo                      | Mendoza                | Argentina/Mendoza                 |
| ROS  | 13                  | 25                  | Islas Malvinas                     | Rosario                | Argentina/Santa Fe                |
| CRP  | 13                  | 15                  | Corpus Christi Intl                | Corpus Christi         | US/Texas                          |
| RSW  | 13                  | 14                  | Southwest Florida International    | Fort Myers             | US/Florida                        |
| PMI  | 13                  | 15                  | Palma De Mallorca                  | Palma de Mallorca      | Spain/Balearic Islands            |
| MPL  | 13                  | 18                  | Mediterranee                       | Montpellier            | France/Occitanie                  |
| VPS  | 12                  | 14                  | Destin-Ft Walton Beach Airport     | Destin-Ft Walton Beach | US/Florida                        |
| VRN  | 12                  | 8                   | Verona                             | Verona                 | Italy/Veneto                      |
| FGI  | 11                  | 20                  | Fagali'I                           | Apia                   | Samoa/Tuamasaga                   |
| GNV  | 11                  | 16                  | J R Alison Regional Municipal      | Gainesville            | US/Florida                        |
| OGG  | 11                  | 13                  | Kahului                            | Kahului/Maui           | US/Hawaii                         |
| VLC  | 11                  | 16                  | Valencia Airport                   | Valencia               | Spain/Valencian Community         |
| CTA  | 11                  | 11                  | Fontanarossa                       | Catania                | Italy/Sicily                      |
| BJM  | 10                  | 17                  | Bujumbura Intl                     | Bujumbura              | Burundi/Bujumbura Mairie          |
| TAB  | 10                  | 8                   | ANR Robinson International         | Tobago                 | Trinidad and Tobago               |
| AGP  | 10                  | 15                  | Malaga Airport                     | Malaga                 | Spain/Andalusia                   |
| ADE  | 10                  | 3                   | Aden International                 | Aden                   | Yemen/Aden                        |
| HRE  | 10                  | 22                  | Harare International               | Harare                 | Zimbabwe/Harare                   |
| PNR  | 9                   | 19                  | Pointe Noire                       | Pointe Noire           | Congo                             |
| PUF  | 9                   | 10                  | Uzein                              | Pau                    | France/Nouvelle-Aquitaine         |
| BIO  | 9                   | 15                  | Bilbao Airport                     | Bilbao                 | Spain/Basque Autonomous Community |
| GOA  | 9                   | 10                  | Cristoforo Colombo                 | Genoa                  | Italy/Liguria                     |
| LPA  | 9                   | 14                  | Gran Canaria                       | Gran Canaria           | Spain/Canary Islands              |
| GRK  | 9                   | 11                  | Regional/R.Gray AAF                | Killeen/Fort Hood      | US/Texas                          |
| WDH  | 9                   | 10                  | Windhoek Intl                      | Windhoek               | Namibia/Khomas                    |
| MAF  | 9                   | 13                  | Midland-Odessa Regl                | Midland/Odessa         | US/Texas                          |
| TRW  | 9                   | 11                  | Bonriki International              | Tarawa                 | Kiribati                          |
| TSV  | 9                   | 12                  | Townsville International           | Townsville             | Australia/Queensland              |
| PSP  | 9                   | 11                  | Palm Springs Muni                  | Palm Springs           | US/California                     |
| MLH  | 9                   | 10                  | Euroairport                        | Mulhouse/Basel         | France/Grand Est                  |
| BES  | 8                   | 11                  | Bretagne                           | Brest                  | France/Brittany                   |
| NKC  | 8                   | 13                  | Nouakchott                         | Nouakchott             | Mauritania/Nouakchott             |
| BRC  | 8                   | 12                  | San Carlos Bariloche International | San Carlos Bariloche   | Argentina/Río Negro               |
| LBB  | 8                   | 10                  | Preston Smith Intl                 | Lubbock                | US/Texas                          |
| AMA  | 8                   | 10                  | Rick Husband Intl                  | Amarillo               | US/Texas                          |
| EYW  | 7                   | 12                  | Key West Intl                      | Key West               | US/Florida                        |

| Code | Imported cases 2011 | Imported cases 2015 | Name                                            | City            | Country/State            |
|------|---------------------|---------------------|-------------------------------------------------|-----------------|--------------------------|
| NDJ  | 7                   | 16                  | Ndjamena                                        | N'Djamena       | Chad/N'Djamena           |
| DAL  | 7                   | 22                  | Dallas Love Field                               | Dallas-Love     | US/Texas                 |
| ECP  | 5                   | 11                  | Northwest Florida Beaches International Airport | Panama City     | US/Florida               |
| NIM  | 5                   | 12                  | Diori Hamani International Airport              | Niamey          | Niger/Niamey             |
| SPN  | 3                   | 11                  | Saipan International                            | Saipan          | Northern Mariana Islands |
| SFB  | 0                   | 10                  | Sanford International                           | Orlando-Sanford | US/Florida               |

**Table E. The ten routes with the highest predicted number of dengue-infected passengers with final destinations in non-endemic countries with vector presence.**

| Orig.                    | Dest.            | Pax | Month |
|--------------------------|------------------|-----|-------|
| SJU (Puerto Rico)        | MCO (Florida)    | 52  | Jul   |
| FDF (Martinique)         | ORY (France)     | 34  | Aug   |
| CUN (Mexico)             | MIA (Florida)    | 32  | Aug   |
| SDQ (Dominican Republic) | MIA (Florida)    | 30  | Aug   |
| CCS (Venezuela)          | MIA (Florida)    | 28  | Aug   |
| GDL (Mexico)             | LAX (California) | 27  | Aug   |
| SJU (Puerto Rico)        | FLL (Florida)    | 25  | Jul   |
| PUJ (Dominican Republic) | MIA (Florida)    | 24  | Jul   |
| MNL (Philippines)        | LAX (California) | 23  | Jul   |
| SJU (Puerto Rico)        | MIA (Florida)    | 23  | Jul   |

**Table F. The ten routes with the highest predicted number of dengue-infected passengers who continue to travel to non-endemic regions.** The table lists the direct routes with the highest predicted volume of dengue-infected passengers who continue to travel to non-endemic regions irrespective of vector presence. The last column records the month during which the highest number of infected passengers are predicted.

| Origin | 2011        |     |       | Origin | 2015        |     |       |
|--------|-------------|-----|-------|--------|-------------|-----|-------|
|        | Destination | Pax | Month |        | Destination | Pax | Month |
| BOM    | DXB         | 108 | Jul   | BOM    | DXB         | 142 | Aug   |
| CUN    | MEX         | 86  | Aug   | DEL    | DXB         | 97  | Aug   |
| DPS    | PER         | 77  | Jan   | CUN    | MEX         | 75  | Aug   |
| SDQ    | JFK         | 76  | Aug   | COK    | DXB         | 72  | Aug   |
| STI    | JFK         | 76  | Aug   | DPS    | PER         | 65  | Jan   |
| DEL    | DXB         | 72  | Jul   | MAA    | DXB         | 59  | Aug   |
| MNL    | ICN         | 71  | Aug   | MNL    | ICN         | 95  | Aug   |
| DEL    | LHR         | 65  | Aug   | HYD    | DXB         | 55  | Aug   |
| MNL    | NRT         | 65  | Jul   | SJU    | JFK         | 57  | Aug   |
| MTY    | MEX         | 62  | Sep   | DEL    | LHR         | 59  | Aug   |

**Table G. Yearly and seasonal reporting rates of imported cases in 2011.**

|            | Dec-Feb | Mar-May | Jun-Aug | Sep-Nov | Yearly |
|------------|---------|---------|---------|---------|--------|
| Queensland | 38.4    | 25.2    | 13.7    | 18.9    | 24.3   |
| Italy      | 5.7     | 4       | 1.9     | 7.3     | 4.4    |
| France     | 2.2     | 3.1     | 4.8     | 1.3     | 3      |
| Florida    | 1.2     | 0.5     | 1       | 2.5     | 1.3    |

## SUPPLEMENTARY FIGURES

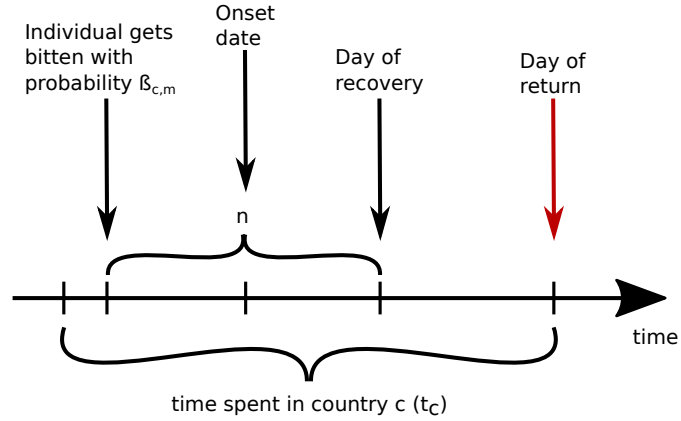

**Figure A. Illustration of the possibility of recovery before return.** If an individual gets infected with dengue while overseas, but recovers before returning to region  $r$ , the individual cannot infect other people in region  $r$ .

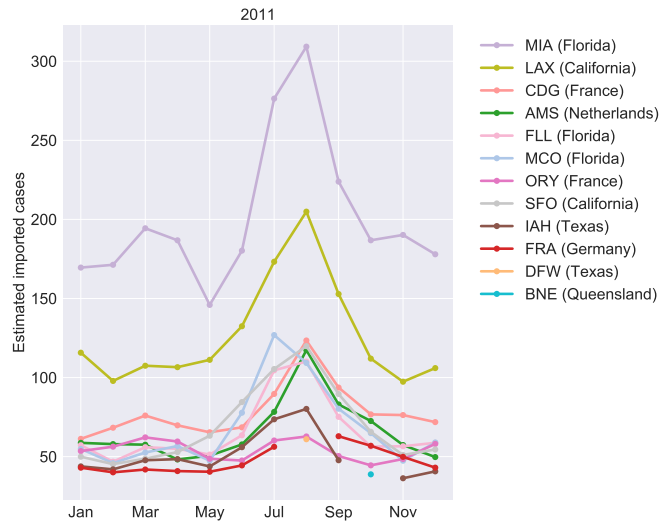

**Figure B. Predicted monthly dengue importations by airport for 2011.** The number of predicted imported dengue infections for the top ten airports in non-endemic countries/states with vector presence for each month in 2011. A break in a line indicates that the corresponding airport was not amongst the top ten during the respective month. Airports are abbreviated using the corresponding IATA code. A full list of abbreviations can be found in the supplementary material (see Table A)

**A**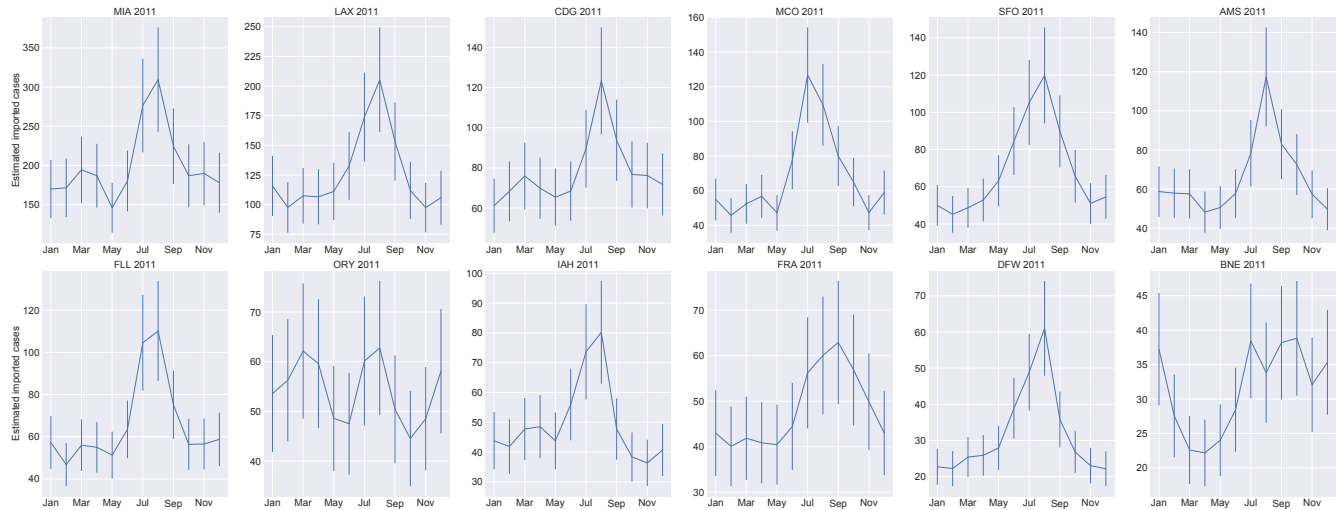**B**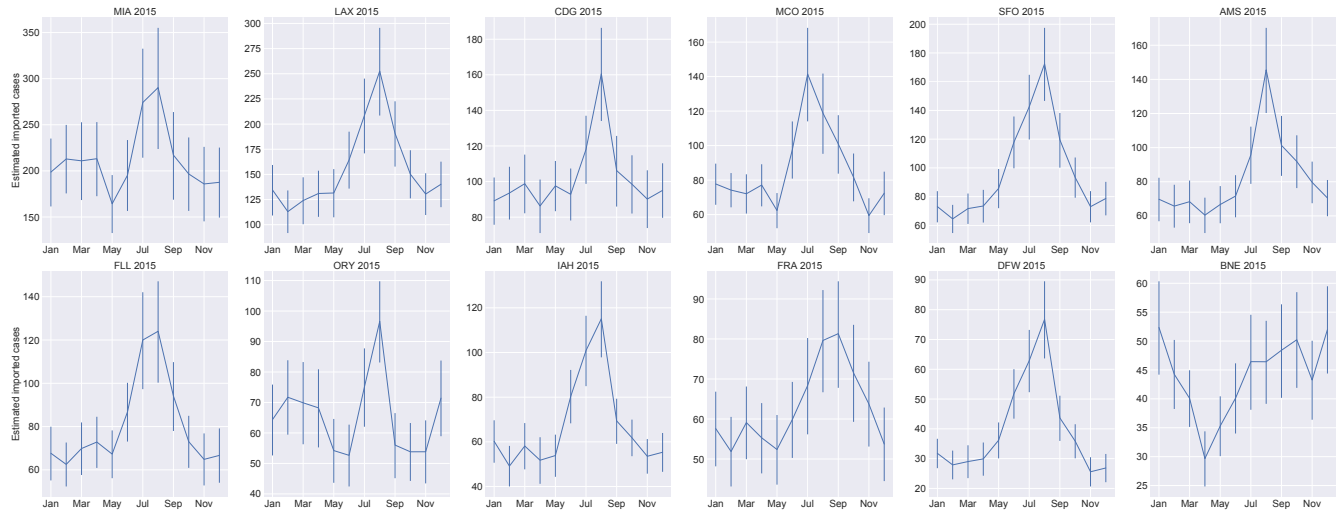

**Figure C. Predicted monthly dengue importations by airport** The number of predicted imported dengue infections for the top ten airports in non-endemic countries/states with vector presence for each month in **(A)** 2011 and **(B)** 2015. The error bars correspond to  $\pm 1$  standard deviation. Airports are abbreviated using the corresponding IATA code.



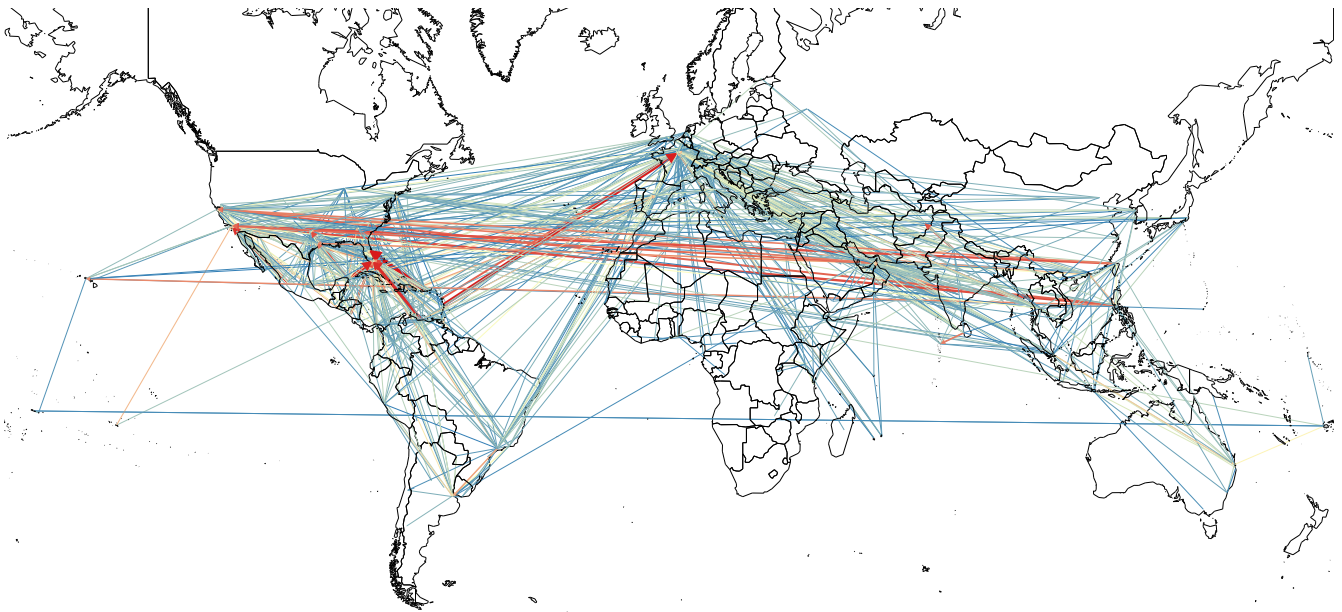

**Figure D. Dengue-infected passengers who continue to travel to non-endemic countries/states with vector presence for every route in the air transportation network** This map corresponds to August 2015. The thickness as well as the colour of an edge represent the number of infected people travelling along the corresponding route. Blue represents relatively lower numbers of infected people, red represents relatively higher numbers of infected travellers and yellow represents the mid range.

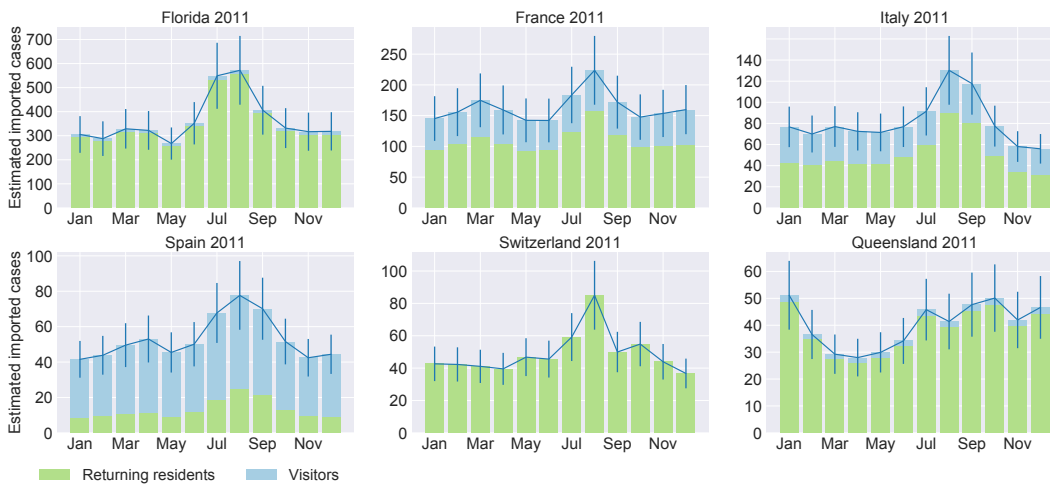

**Figure E. Predicted dengue infections imported by returning residents and visitors in 2011** Here we show the results for non-endemic countries/states with vector presence with the highest number of predicted imported dengue cases in 2011. The bars are stacked to distinguish between returning residents (green) and visitors (blue). The blue solid line corresponds to the total number of imported cases. The error bars correspond to the model's coefficient of variation (see Material and methods).

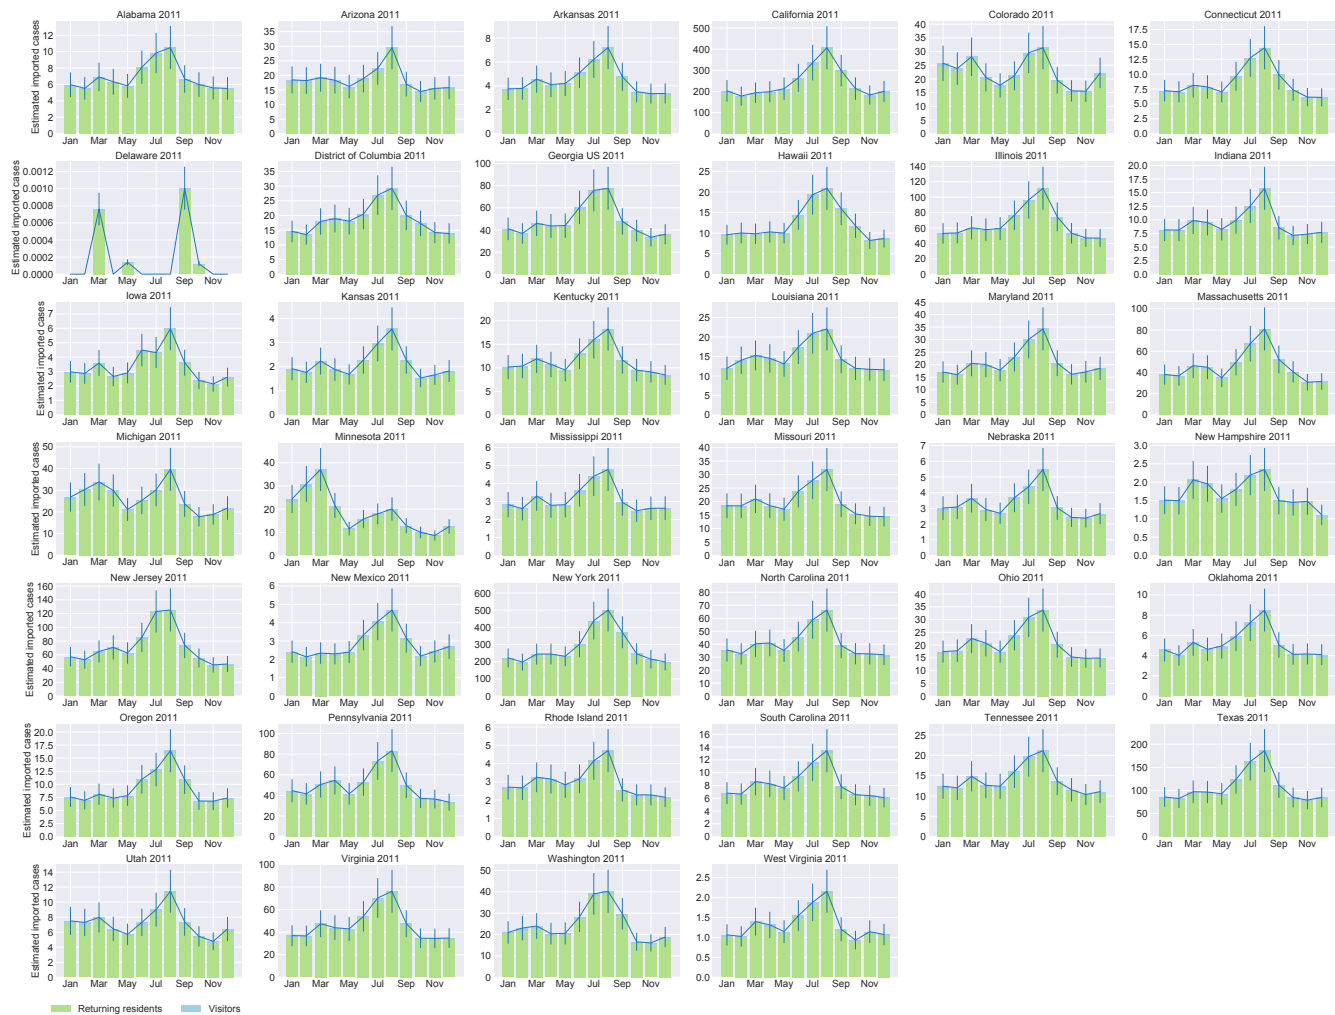

**Figure F. Predicted imported dengue infections for returning residents and visitors for US states in 2011.** The bars are stacked to distinguish between returning residents (green) and visitors (blue). The blue solid line corresponds to the total number of imported cases. The error bars correspond to the model's coefficient of variation (13.49%) that was inferred through Monte Carlo simulations.

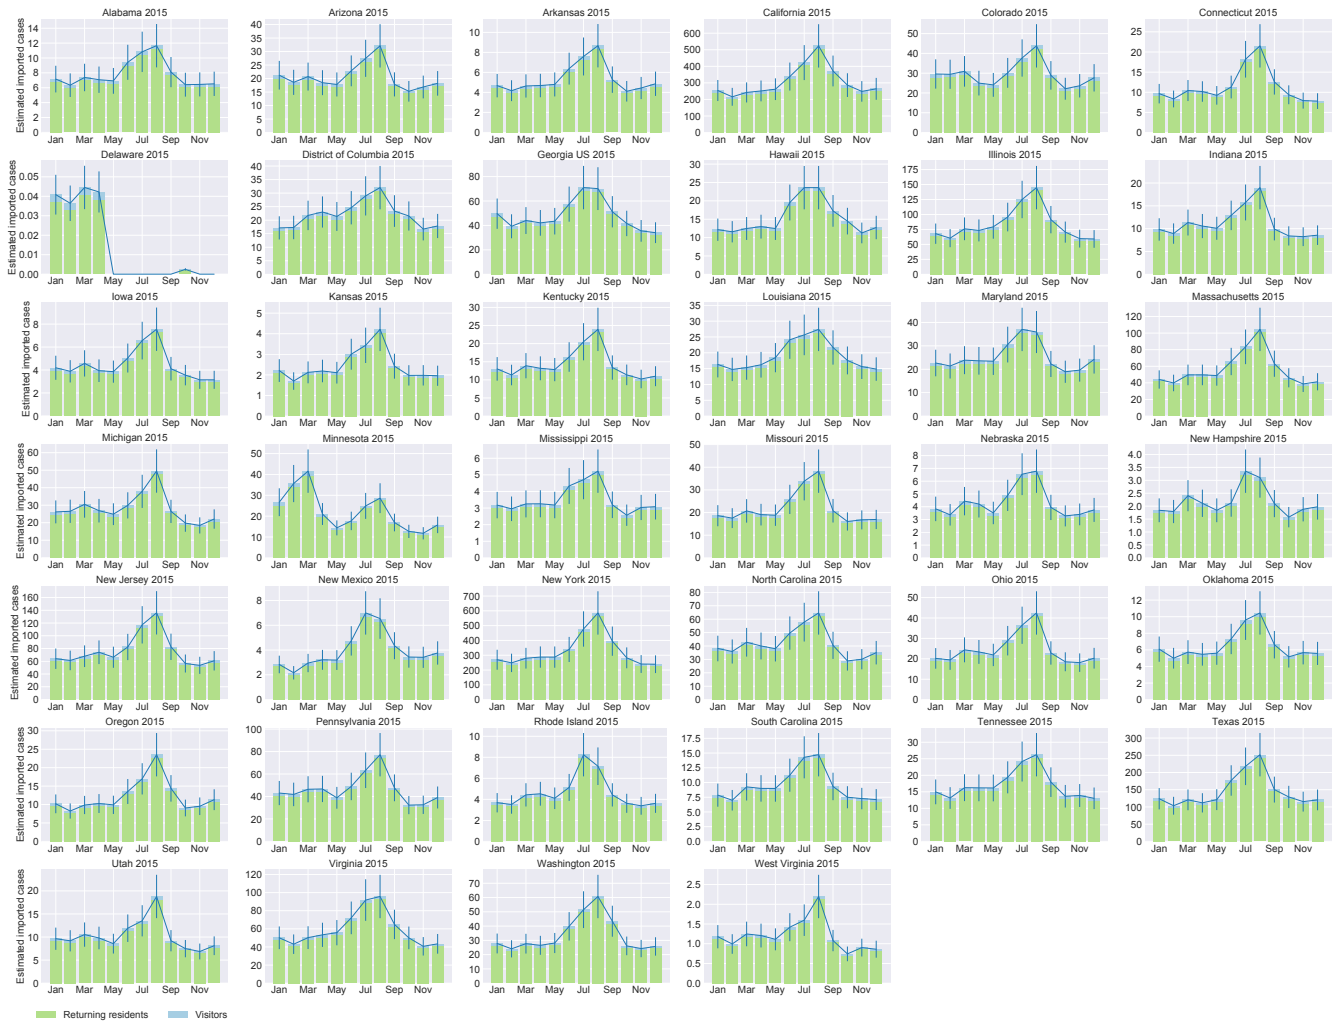

**Figure G. Predicted imported dengue infections for returning residents and visitors for US states in 2015.** The bars are stacked to distinguish between returning residents (green) and visitors (blue). The blue solid line corresponds to the total number of imported cases. The error bars correspond to the model's coefficient of variation (13.49%) that was inferred through Monte Carlo simulations.

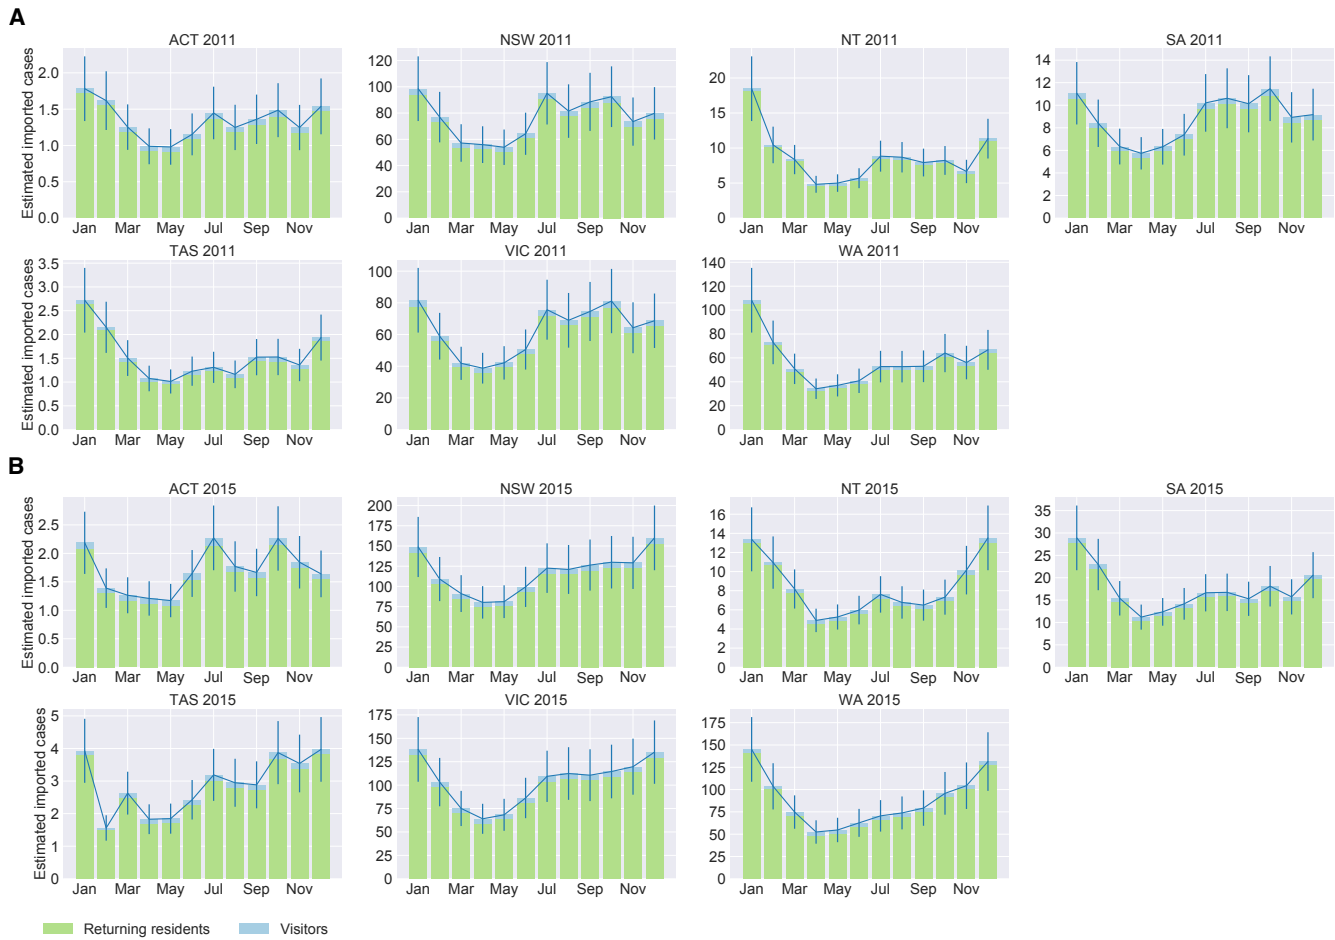

**Figure H. Predicted imported dengue infections for returning residents and visitors for Australian states.** ACT: Australian Capital Territory, NSW: New South Wales, NT: Northern Territory, SA: South Australia, TAS: Tasmania, VIC: Victoria, WA: Western Australia. The bars are stacked to distinguish between returning residents (green) and visitors (blue). The blue solid line corresponds to the total number of imported cases. The error bars correspond to the model's coefficient of variation (13.49%) that was inferred through Monte Carlo simulations.

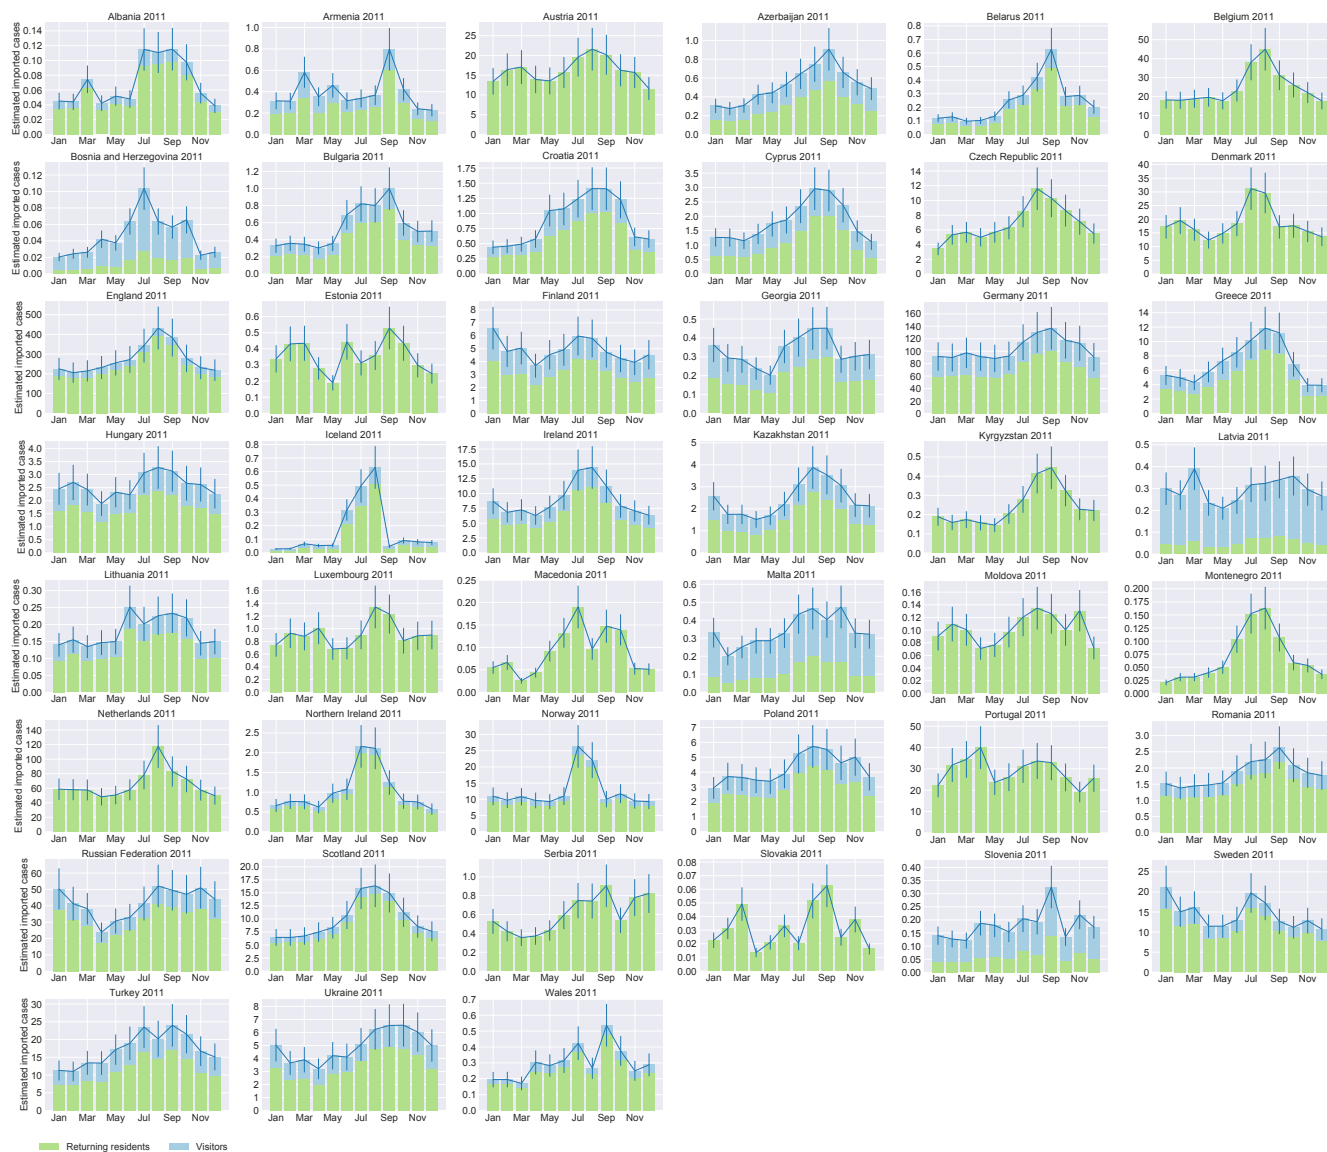

**Figure I. Predicted imported dengue infections for returning residents and visitors for European countries in 2011.** The bars are stacked to distinguish between returning residents (green) and visitors (blue). The blue solid line corresponds to the total number of imported cases. The error bars correspond to the model's coefficient of variation (13.49%) that was inferred through Monte Carlo simulations.

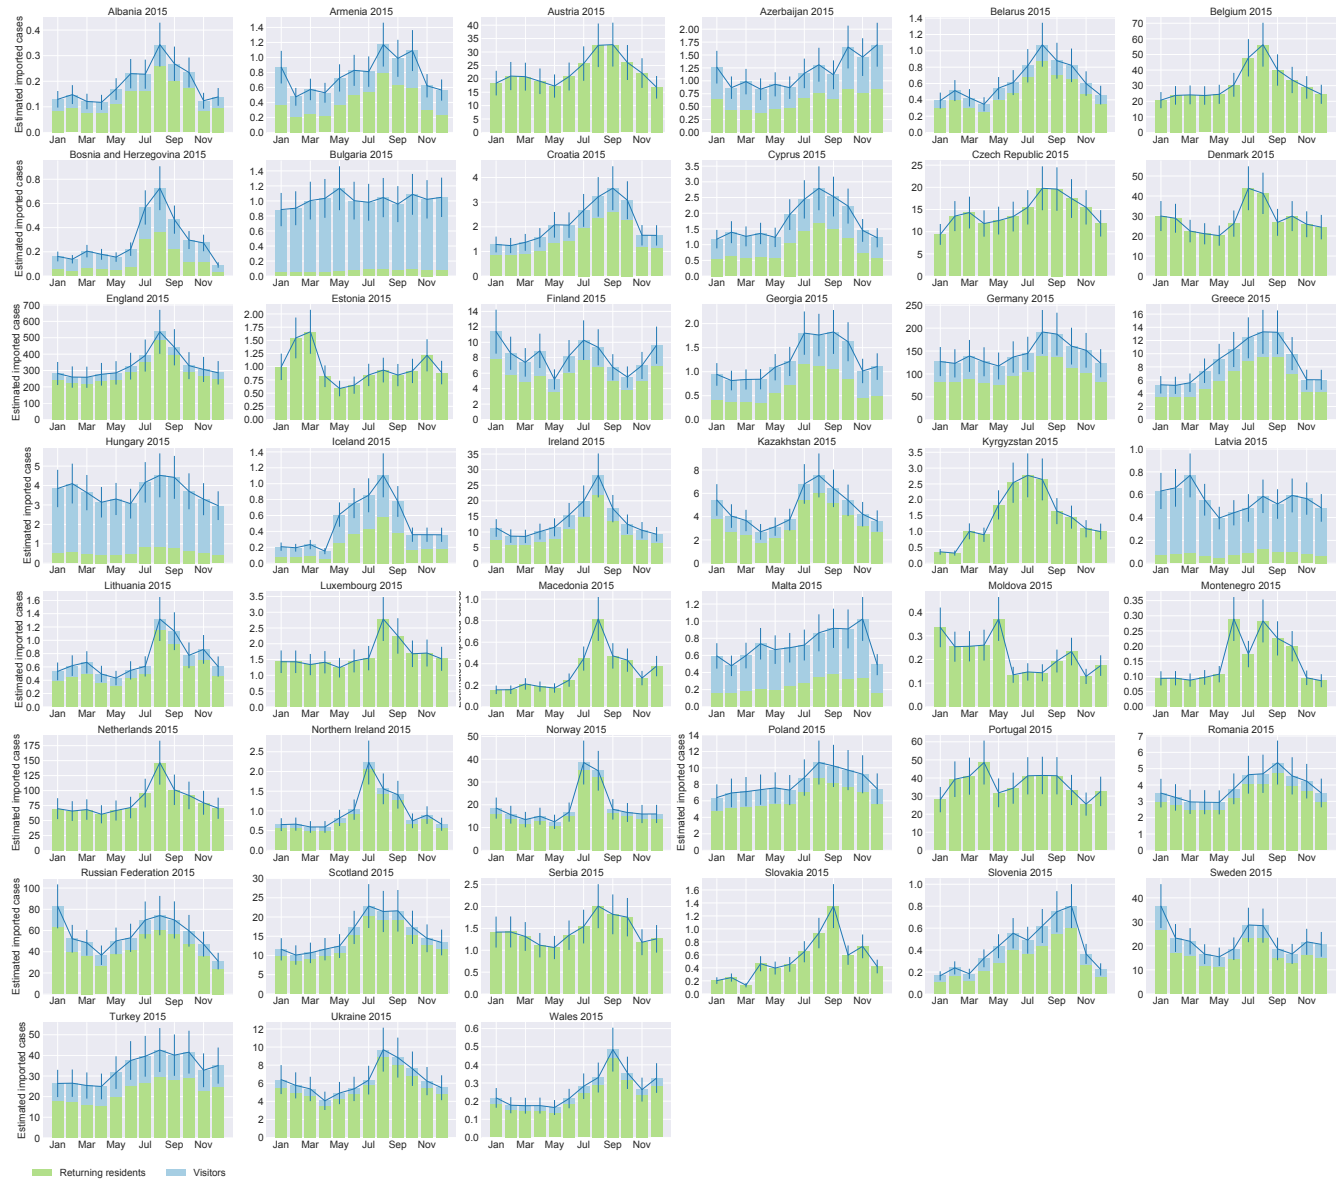

**Figure J. Predicted imported dengue infections for returning residents and visitors for European countries in 2015.** The bars are stacked to distinguish between returning residents (green) and visitors (blue). The blue solid line corresponds to the total number of imported cases. The error bars correspond to the model's coefficient of variation (13.49%) that was inferred through Monte Carlo simulations.

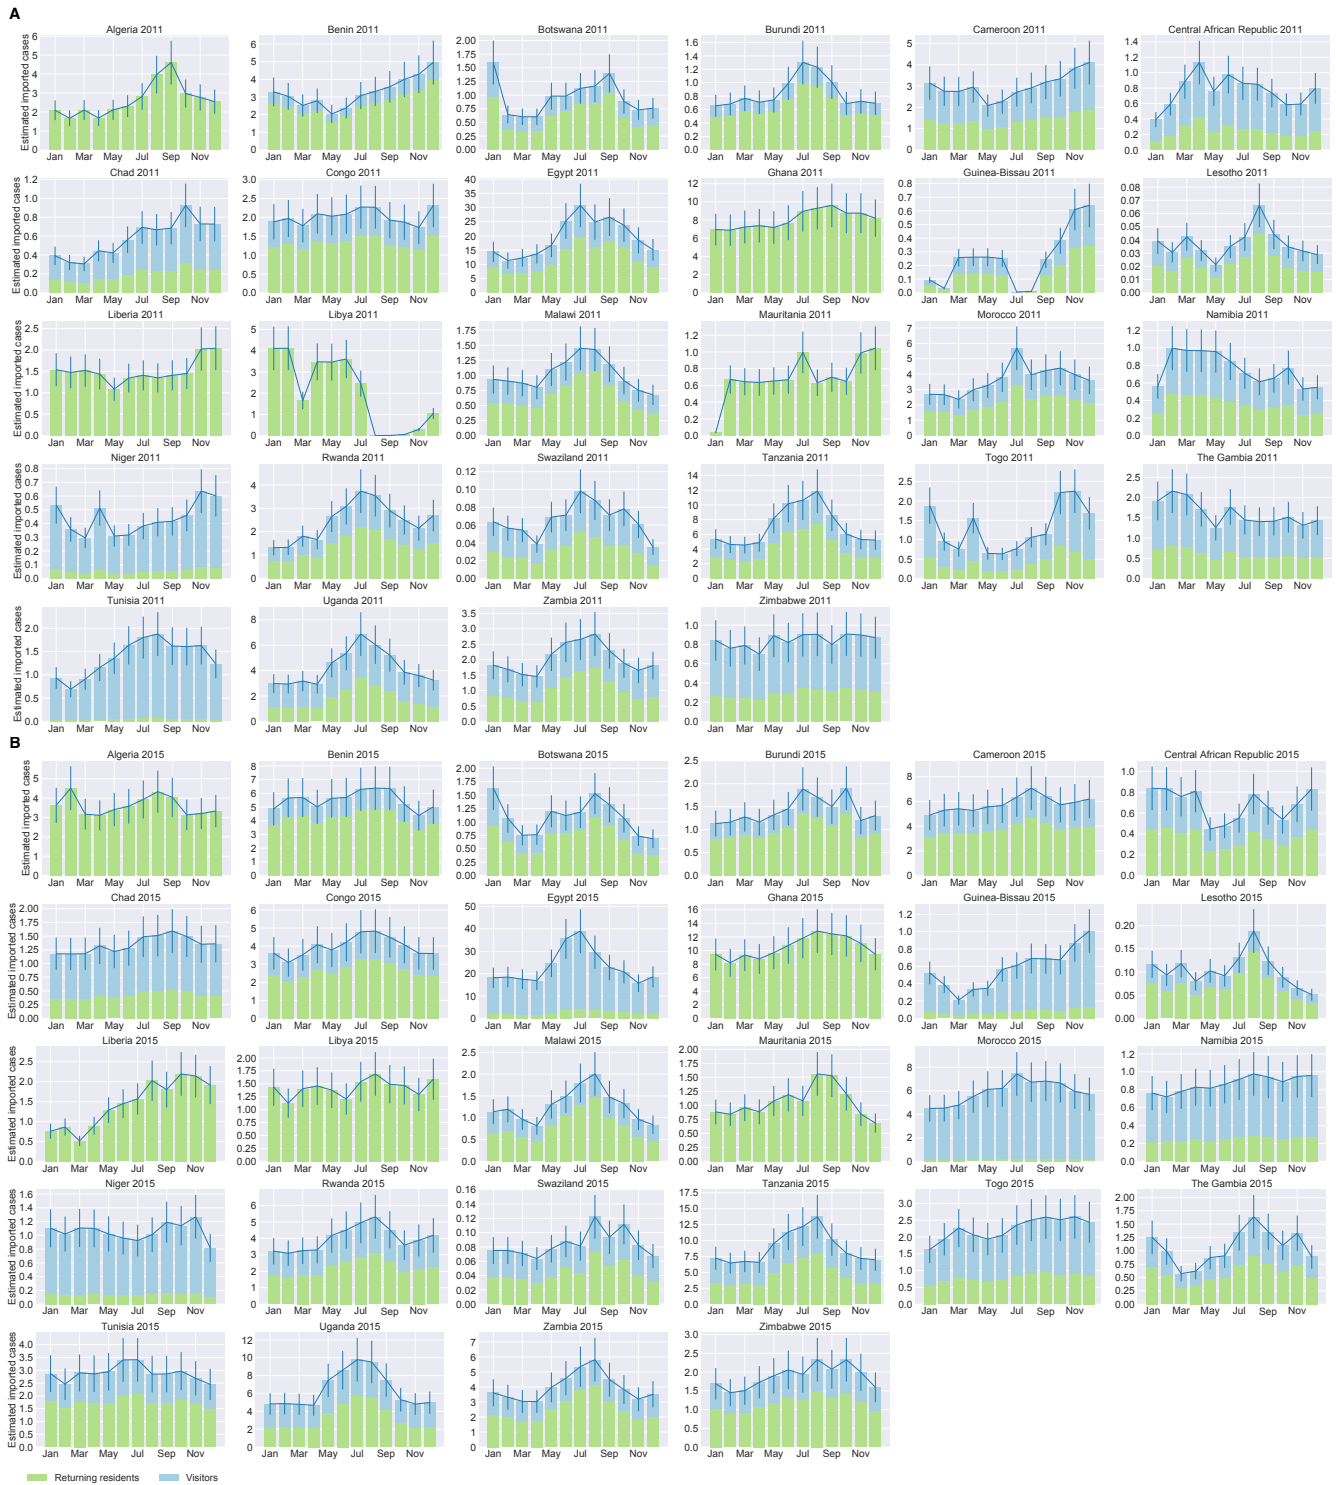

**Figure K. Predicted imported dengue infections for returning residents and visitors for non-endemic African countries.** The bars are stacked to distinguish between returning residents (green) and visitors (blue). The blue solid line corresponds to the total number of imported cases. The error bars correspond to the model's coefficient of variation (13.49%) that was inferred through Monte Carlo simulations.

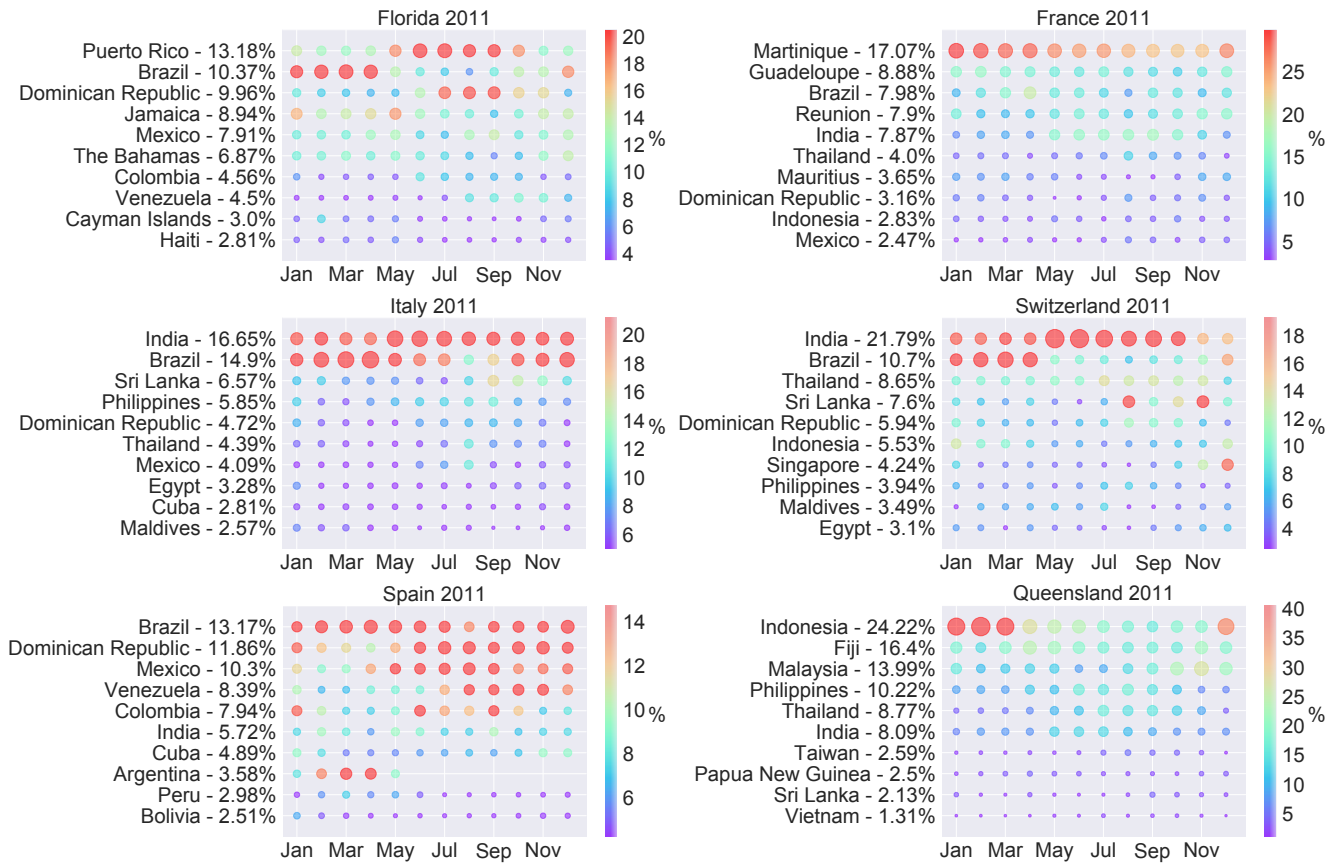

**Figure L. Predicted percentage contribution of dengue importations by country of acquisition in 2011.** The predicted percentage contribution by source country and month in 2011. The size and colour of the circles indicate the percentage contribution of the corresponding country to the total number of imported cases. The *y*-labels indicate the yearly percentage contribution of the corresponding source country.



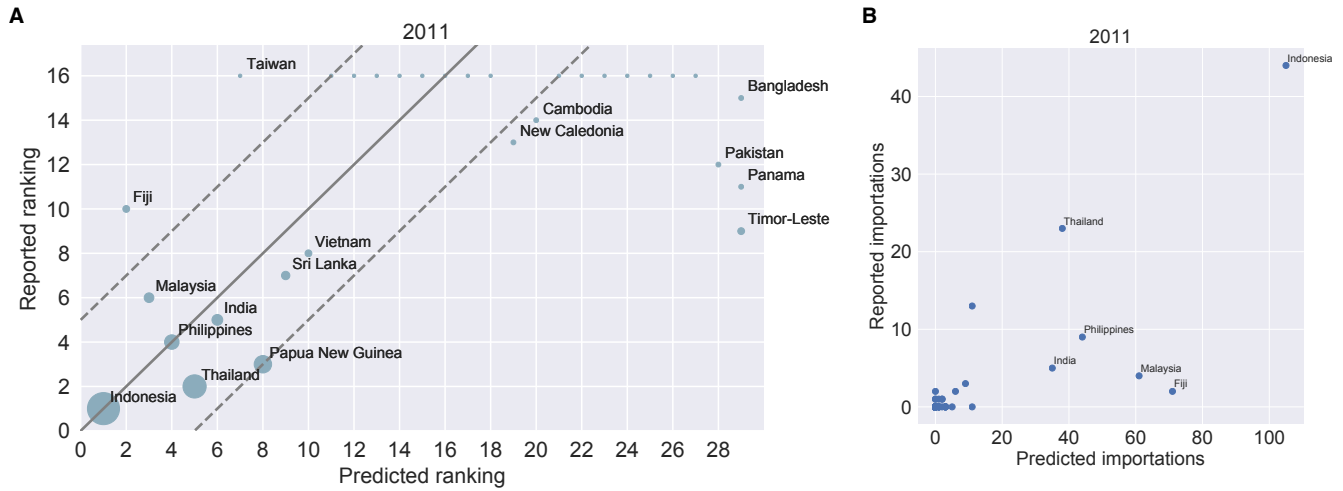

**Figure M. Rank-based validation and correlation between reported and predicted imported cases for Queensland in 2011.** (A) Countries are ranked by the total number of predicted and reported imported dengue cases. The reported ranking is then plotted against the predicted ranking. Countries that were ranked by the model, but did not appear in the dataset receive a rank of  $i + 1$ , where  $i$  is the number of unique importation sources according to the dengue case data. Similarly, countries that appeared in the data and were not ranked by the model receive a rank of  $i + 1$ . For circles that lie on the  $x = y$  line (grey solid line) the predicted and reported rankings are equal. Circles that lie between the two dashed lines correspond to countries with a difference in ranking that is less than or equal to five. The circle areas are scaled proportionally to the number of reported cases that were imported from the corresponding country. Spearman's rank correlation coefficient between the absolute numbers of reported and predicted importations is equal to 0.58. (B) The absolute number of reported dengue importations are plotted against the absolute number of predicted importations.

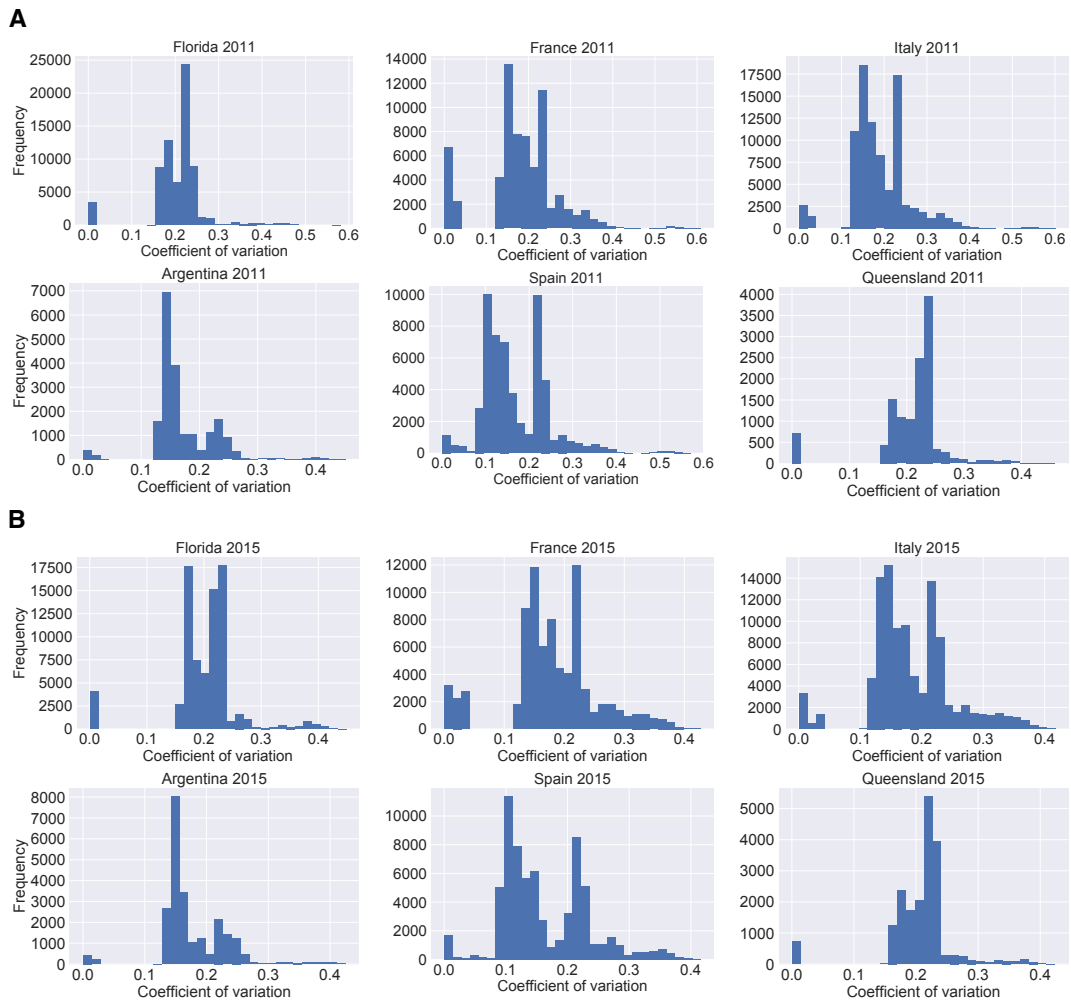

**Figure N. The distribution of the coefficient of variation for several destinations. (A) Distributions for 2011. (B) Distributions for 2015.**

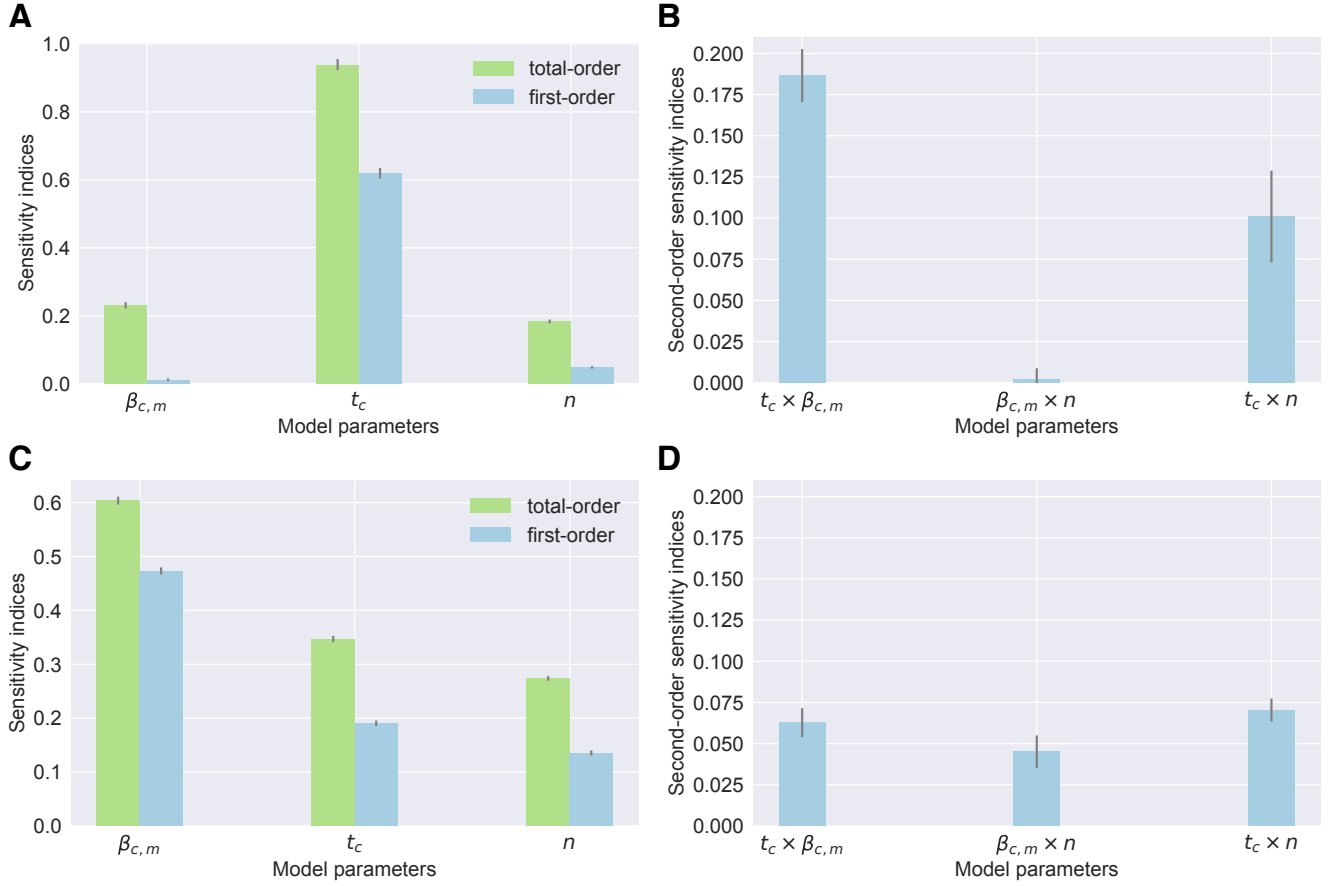

**Figure O. Sobol's sensitivity analysis of the model's parameters.** Parameter  $\beta_{c,m}$  denotes the daily dengue incidence rate of country  $c$  during month  $m$ , parameter  $t_c$  denotes the number of days a traveller who arrives at a given airport has spent in country  $c$  and parameter  $n$  denotes the sum of the intrinsic incubation period and the infectious period in humans. **(A)** The first-order and total-order indices for the parameter ranges as shown in Table 1 of the main manuscript. The indices indicate that  $t_c$  is the most important model parameter. **(B)** The second-order indices for the parameter ranges as shown in Table 1 of the main manuscript. There is significant interactions between parameters  $t_c$  and  $\beta_{c,m}$  and between parameters  $t_c$  and  $n$ . **(C)** The first-order and total-order indices for a shorter range of value ([1, 30] days) for parameter  $t_c$ . In this case  $\beta_{c,m}$  is the most important parameter. **(D)** The second-order indices for a shorter range of value ([1, 30] days) for parameter  $t_c$ . There is still significant interaction between parameters  $t_c$  and  $\beta_{c,m}$  and between parameters  $t_c$  and  $n$ .

## REFERENCES

- [1] Centers for Disease Control and Prevention. 2019 [cited 31/07/19]. Available from: <https://www.healthmap.org/dengue/en/>.
- [2] International Association for Medical Assistance to Travellers (IAMAT). 2018 [cited 6/11/18]. Available from: <https://www.iamat.org/>.
